# Supplementary material
Source: PubMed Central journal article supplement (PMC4976798)

# ANOVA

One-way completely randomized

Shannon-based effective species number (mountain lakes)

|                 | Austria | Chile | Ethiopia |
|-----------------|---------|-------|----------|
| 1               | 2.4     | 3.6   | 71.5     |
| 2               | 17.9    | 2.2   | 6.1      |
| 3               | 15.7    | 4.9   | 4.6      |
| 4               | 12.9    | 8.1   | 50.7     |
| 5               | 5.7     | 4.1   | 34.1     |
| 6               | 1.9     | 11.6  |          |
| 7               | 2.6     |       |          |
| 8               | 11.1    |       |          |
| <b>n</b>        | 8       | 6     | 5        |
| $\bar{X}$       | 8.775   | 5.750 | 33.400   |
| <b>s</b>        | 6.427   | 3.476 | 28.836   |
| $\bar{X}_{ave}$ | 14.300  |       |          |

| source     | df | SS       | MS       | F      | P-value |
|------------|----|----------|----------|--------|---------|
| treatments | 2  | 2506.870 | 1253.435 | 5.4561 | 0.0156  |
| error      | 16 | 3675.670 | 229.729  |        |         |
| total      | 18 | 6182.540 |          |        |         |

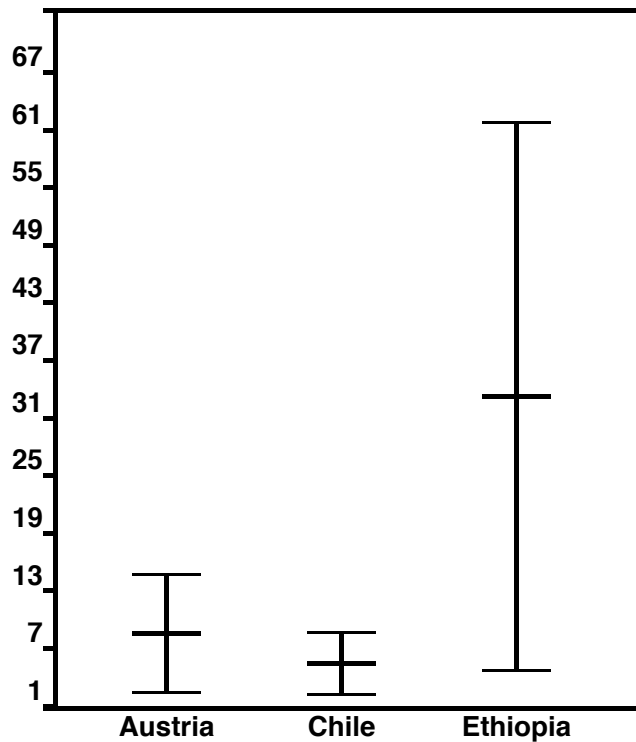

Supplement: NIHMS69372-supplement-Figure_S4.pdf [file NIHMS69372-supplement-Figure_S4.pdf]
